# Supplementary material
Source: ML conference proceedings conference paper supplement (https://proceedings.neurips.cc/paper_files/paper/2022/hash/005413e90d003d13886019607b037f52-Abstract.html)
Supplement: Supplementary file 1 [file 005413e90d003d13886019607b037f52-Supplemental-Conference.zip]

Archive with 164 entries (150 files):
- neurips_supplementary_material/
- __MACOSX/._neurips_supplementary_material
- neurips_supplementary_material/.DS_Store
- __MACOSX/neurips_supplementary_material/._.DS_Store
- neurips_supplementary_material/fast_bayesian_coresets_supp.pdf
- __MACOSX/neurips_supplementary_material/._fast_bayesian_coresets_supp.pdf
- neurips_supplementary_material/fast-bayesian-coresets/
- __MACOSX/neurips_supplementary_material/._fast-bayesian-coresets
- neurips_supplementary_material/fast-bayesian-coresets/.DS_Store
- __MACOSX/neurips_supplementary_material/fast-bayesian-coresets/._.DS_Store
- neurips_supplementary_material/fast-bayesian-coresets/bayesiancoresets/
- __MACOSX/neurips_supplementary_material/fast-bayesian-coresets/._bayesiancoresets
- neurips_supplementary_material/fast-bayesian-coresets/README.md
- __MACOSX/neurips_supplementary_material/fast-bayesian-coresets/._README.md
- neurips_supplementary_material/fast-bayesian-coresets/setup.py
- __MACOSX/neurips_supplementary_material/fast-bayesian-coresets/._setup.py
- neurips_supplementary_material/fast-bayesian-coresets/.gitignore
- __MACOSX/neurips_supplementary_material/fast-bayesian-coresets/._.gitignore
- neurips_supplementary_material/fast-bayesian-coresets/examples/
- __MACOSX/neurips_supplementary_material/fast-bayesian-coresets/._examples
- neurips_supplementary_material/fast-bayesian-coresets/.idea/
- __MACOSX/neurips_supplementary_material/fast-bayesian-coresets/._.idea
- neurips_supplementary_material/fast-bayesian-coresets/bayesiancoresets/.DS_Store
- __MACOSX/neurips_supplementary_material/fast-bayesian-coresets/bayesiancoresets/._.DS_Store
- neurips_supplementary_material/fast-bayesian-coresets/bayesiancoresets/util/
- __MACOSX/neurips_supplementary_material/fast-bayesian-coresets/bayesiancoresets/._util
- neurips_supplementary_material/fast-bayesian-coresets/bayesiancoresets/__init__.py
- __MACOSX/neurips_supplementary_material/fast-bayesian-coresets/bayesiancoresets/.___init__.py
- neurips_supplementary_material/fast-bayesian-coresets/bayesiancoresets/projector.py
- __MACOSX/neurips_supplementary_material/fast-bayesian-coresets/bayesiancoresets/._projector.py
- neurips_supplementary_material/fast-bayesian-coresets/bayesiancoresets/snnls/
- __MACOSX/neurips_supplementary_material/fast-bayesian-coresets/bayesiancoresets/._snnls
- neurips_supplementary_material/fast-bayesian-coresets/bayesiancoresets/coreset/
- __MACOSX/neurips_supplementary_material/fast-bayesian-coresets/bayesiancoresets/._coreset
- neurips_supplementary_material/fast-bayesian-coresets/examples/.DS_Store
- __MACOSX/neurips_supplementary_material/fast-bayesian-coresets/examples/._.DS_Store
- neurips_supplementary_material/fast-bayesian-coresets/examples/gaussian/
- __MACOSX/neurips_supplementary_material/fast-bayesian-coresets/examples/._gaussian
- neurips_supplementary_material/fast-bayesian-coresets/examples/logistic_heavy_tailed/
- __MACOSX/neurips_supplementary_material/fast-bayesian-coresets/examples/._logistic_heavy_tailed
- neurips_supplementary_material/fast-bayesian-coresets/examples/linear_regression/
- __MACOSX/neurips_supplementary_material/fast-bayesian-coresets/examples/._linear_regression
- neurips_supplementary_material/fast-bayesian-coresets/examples/common/
- __MACOSX/neurips_supplementary_material/fast-bayesian-coresets/examples/._common
- neurips_supplementary_material/fast-bayesian-coresets/examples/data/
- __MACOSX/neurips_supplementary_material/fast-bayesian-coresets/examples/._data
- neurips_supplementary_material/fast-bayesian-coresets/examples/sparse_regression/
- __MACOSX/neurips_supplementary_material/fast-bayesian-coresets/examples/._sparse_regression
- neurips_supplementary_material/fast-bayesian-coresets/.idea/bayesian-coresets-neurips.iml
- __MACOSX/neurips_supplementary_material/fast-bayesian-coresets/.idea/._bayesian-coresets-neurips.iml
- neurips_supplementary_material/fast-bayesian-coresets/.idea/workspace.xml
- __MACOSX/neurips_supplementary_material/fast-bayesian-coresets/.idea/._workspace.xml
- neurips_supplementary_material/fast-bayesian-coresets/.idea/modules.xml
- __MACOSX/neurips_supplementary_material/fast-bayesian-coresets/.idea/._modules.xml
- neurips_supplementary_material/fast-bayesian-coresets/.idea/misc.xml
- __MACOSX/neurips_supplementary_material/fast-bayesian-coresets/.idea/._misc.xml
- neurips_supplementary_material/fast-bayesian-coresets/bayesiancoresets/util/log.py
- __MACOSX/neurips_supplementary_material/fast-bayesian-coresets/bayesiancoresets/util/._log.py
- neurips_supplementary_material/fast-bayesian-coresets/bayesiancoresets/util/__init__.py
- __MACOSX/neurips_supplementary_material/fast-bayesian-coresets/bayesiancoresets/util/.___init__.py
- neurips_supplementary_material/fast-bayesian-coresets/bayesiancoresets/util/opt.py
- __MACOSX/neurips_supplementary_material/fast-bayesian-coresets/bayesiancoresets/util/._opt.py
- neurips_supplementary_material/fast-bayesian-coresets/bayesiancoresets/util/errors.py
- __MACOSX/neurips_supplementary_material/fast-bayesian-coresets/bayesiancoresets/util/._errors.py
- neurips_supplementary_material/fast-bayesian-coresets/bayesiancoresets/snnls/giga.py
- __MACOSX/neurips_supplementary_material/fast-bayesian-coresets/bayesiancoresets/snnls/._giga.py
- neurips_supplementary_material/fast-bayesian-coresets/bayesiancoresets/snnls/frankwolfe.py
- __MACOSX/neurips_supplementary_material/fast-bayesian-coresets/bayesiancoresets/snnls/._frankwolfe.py
- neurips_supplementary_material/fast-bayesian-coresets/bayesiancoresets/snnls/__init__.py
- __MACOSX/neurips_supplementary_material/fast-bayesian-coresets/bayesiancoresets/snnls/.___init__.py
- neurips_supplementary_material/fast-bayesian-coresets/bayesiancoresets/snnls/sampling.py
- __MACOSX/neurips_supplementary_material/fast-bayesian-coresets/bayesiancoresets/snnls/._sampling.py
- neurips_supplementary_material/fast-bayesian-coresets/bayesiancoresets/snnls/orthopursuit.py
- __MACOSX/neurips_supplementary_material/fast-bayesian-coresets/bayesiancoresets/snnls/._orthopursuit.py
- neurips_supplementary_material/fast-bayesian-coresets/bayesiancoresets/snnls/iht.py
- __MACOSX/neurips_supplementary_material/fast-bayesian-coresets/bayesiancoresets/snnls/._iht.py
- neurips_supplementary_material/fast-bayesian-coresets/bayesiancoresets/snnls/snnls.py
- __MACOSX/neurips_supplementary_material/fast-bayesian-coresets/bayesiancoresets/snnls/._snnls.py
- neurips_supplementary_material/fast-bayesian-coresets/bayesiancoresets/coreset/coreset.py
- __MACOSX/neurips_supplementary_material/fast-bayesian-coresets/bayesiancoresets/coreset/._coreset.py
- neurips_supplementary_material/fast-bayesian-coresets/bayesiancoresets/coreset/sparsevi.py
- __MACOSX/neurips_supplementary_material/fast-bayesian-coresets/bayesiancoresets/coreset/._sparsevi.py
- neurips_supplementary_material/fast-bayesian-coresets/bayesiancoresets/coreset/newton.py
- __MACOSX/neurips_supplementary_material/fast-bayesian-coresets/bayesiancoresets/coreset/._newton.py
- neurips_supplementary_material/fast-bayesian-coresets/bayesiancoresets/coreset/__init__.py
- __MACOSX/neurips_supplementary_material/fast-bayesian-coresets/bayesiancoresets/coreset/.___init__.py
- neurips_supplementary_material/fast-bayesian-coresets/bayesiancoresets/coreset/hilbert.py
- __MACOSX/neurips_supplementary_material/fast-bayesian-coresets/bayesiancoresets/coreset/._hilbert.py
- neurips_supplementary_material/fast-bayesian-coresets/bayesiancoresets/coreset/sampling.py
- __MACOSX/neurips_supplementary_material/fast-bayesian-coresets/bayesiancoresets/coreset/._sampling.py
- neurips_supplementary_material/fast-bayesian-coresets/bayesiancoresets/coreset/bpsvi.py
- __MACOSX/neurips_supplementary_material/fast-bayesian-coresets/bayesiancoresets/coreset/._bpsvi.py
- neurips_supplementary_material/fast-bayesian-coresets/examples/gaussian/.DS_Store
- __MACOSX/neurips_supplementary_material/fast-bayesian-coresets/examples/gaussian/._.DS_Store
- neurips_supplementary_material/fast-bayesian-coresets/examples/gaussian/run_experiment.sh
- __MACOSX/neurips_supplementary_material/fast-bayesian-coresets/examples/gaussian/._run_experiment.sh
- neurips_supplementary_material/fast-bayesian-coresets/examples/gaussian/plot_coreset_pts.py
- __MACOSX/neurips_supplementary_material/fast-bayesian-coresets/examples/gaussian/._plot_coreset_pts.py
- neurips_supplementary_material/fast-bayesian-coresets/examples/gaussian/make_plots.sh
- __MACOSX/neurips_supplementary_material/fast-bayesian-coresets/examples/gaussian/._make_plots.sh
- neurips_supplementary_material/fast-bayesian-coresets/examples/gaussian/main.py
- __MACOSX/neurips_supplementary_material/fast-bayesian-coresets/examples/gaussian/._main.py
- neurips_supplementary_material/fast-bayesian-coresets/examples/logistic_heavy_tailed/run_experiment.sh
- __MACOSX/neurips_supplementary_material/fast-bayesian-coresets/examples/logistic_heavy_tailed/._run_experiment.sh
- neurips_supplementary_material/fast-bayesian-coresets/examples/logistic_heavy_tailed/make_plots.sh
- __MACOSX/neurips_supplementary_material/fast-bayesian-coresets/examples/logistic_heavy_tailed/._make_plots.sh
- neurips_supplementary_material/fast-bayesian-coresets/examples/logistic_heavy_tailed/main.py
- __MACOSX/neurips_supplementary_material/fast-bayesian-coresets/examples/logistic_heavy_tailed/._main.py
- neurips_supplementary_material/fast-bayesian-coresets/examples/linear_regression/run_experiment.sh
- __MACOSX/neurips_supplementary_material/fast-bayesian-coresets/examples/linear_regression/._run_experiment.sh
- neurips_supplementary_material/fast-bayesian-coresets/examples/linear_regression/plot_coreset_pts.py
- __MACOSX/neurips_supplementary_material/fast-bayesian-coresets/examples/linear_regression/._plot_coreset_pts.py
- neurips_supplementary_material/fast-bayesian-coresets/examples/linear_regression/make_plots.sh
- __MACOSX/neurips_supplementary_material/fast-bayesian-coresets/examples/linear_regression/._make_plots.sh
- neurips_supplementary_material/fast-bayesian-coresets/examples/linear_regression/main.py
- __MACOSX/neurips_supplementary_material/fast-bayesian-coresets/examples/linear_regression/._main.py
- neurips_supplementary_material/fast-bayesian-coresets/examples/common/laplace.py
- __MACOSX/neurips_supplementary_material/fast-bayesian-coresets/examples/common/._laplace.py
- neurips_supplementary_material/fast-bayesian-coresets/examples/common/model_linreg.py
- __MACOSX/neurips_supplementary_material/fast-bayesian-coresets/examples/common/._model_linreg.py
- neurips_supplementary_material/fast-bayesian-coresets/examples/common/results.py
- __MACOSX/neurips_supplementary_material/fast-bayesian-coresets/examples/common/._results.py
- neurips_supplementary_material/fast-bayesian-coresets/examples/common/model_gaussian.py
- __MACOSX/neurips_supplementary_material/fast-bayesian-coresets/examples/common/._model_gaussian.py
- neurips_supplementary_material/fast-bayesian-coresets/examples/common/plotting.py
- __MACOSX/neurips_supplementary_material/fast-bayesian-coresets/examples/common/._plotting.py
- neurips_supplementary_material/fast-bayesian-coresets/examples/common/model_sparsereg.py
- __MACOSX/neurips_supplementary_material/fast-bayesian-coresets/examples/common/._model_sparsereg.py
- neurips_supplementary_material/fast-bayesian-coresets/examples/common/mcmc.py
- __MACOSX/neurips_supplementary_material/fast-bayesian-coresets/examples/common/._mcmc.py
- neurips_supplementary_material/fast-bayesian-coresets/examples/common/model_lr_heavy_tailed.py
- __MACOSX/neurips_supplementary_material/fast-bayesian-coresets/examples/common/._model_lr_heavy_tailed.py
- neurips_supplementary_material/fast-bayesian-coresets/examples/common/multi_t.py
- __MACOSX/neurips_supplementary_material/fast-bayesian-coresets/examples/common/._multi_t.py
- neurips_supplementary_material/fast-bayesian-coresets/examples/common/stein.py
- __MACOSX/neurips_supplementary_material/fast-bayesian-coresets/examples/common/._stein.py
- neurips_supplementary_material/fast-bayesian-coresets/examples/data/prices2018.npy
- __MACOSX/neurips_supplementary_material/fast-bayesian-coresets/examples/data/._prices2018.npy
- neurips_supplementary_material/fast-bayesian-coresets/examples/data/delays.npy
- __MACOSX/neurips_supplementary_material/fast-bayesian-coresets/examples/data/._delays.npy
- neurips_supplementary_material/fast-bayesian-coresets/examples/data/get_airdelay_data.py
- __MACOSX/neurips_supplementary_material/fast-bayesian-coresets/examples/data/._get_airdelay_data.py
- neurips_supplementary_material/fast-bayesian-coresets/examples/data/download.py
- __MACOSX/neurips_supplementary_material/fast-bayesian-coresets/examples/data/._download.py
- neurips_supplementary_material/fast-bayesian-coresets/examples/data/get_synthetic_gaussian_data.py
- __MACOSX/neurips_supplementary_material/fast-bayesian-coresets/examples/data/._get_synthetic_gaussian_data.py
- neurips_supplementary_material/fast-bayesian-coresets/examples/data/run.sh
- __MACOSX/neurips_supplementary_material/fast-bayesian-coresets/examples/data/._run.sh
- neurips_supplementary_material/fast-bayesian-coresets/examples/data/get_housing_data.py
- __MACOSX/neurips_supplementary_material/fast-bayesian-coresets/examples/data/._get_housing_data.py
- neurips_supplementary_material/fast-bayesian-coresets/examples/data/plot_housing_prices.py
- __MACOSX/neurips_supplementary_material/fast-bayesian-coresets/examples/data/._plot_housing_prices.py
- neurips_supplementary_material/fast-bayesian-coresets/examples/data/delays_medium.npy
- __MACOSX/neurips_supplementary_material/fast-bayesian-coresets/examples/data/._delays_medium.npy
- neurips_supplementary_material/fast-bayesian-coresets/examples/data/get_criteo_data.py
- __MACOSX/neurips_supplementary_material/fast-bayesian-coresets/examples/data/._get_criteo_data.py
- neurips_supplementary_material/fast-bayesian-coresets/examples/data/criteo.npz
- __MACOSX/neurips_supplementary_material/fast-bayesian-coresets/examples/data/._criteo.npz
- neurips_supplementary_material/fast-bayesian-coresets/examples/sparse_regression/run_experiment.sh
- __MACOSX/neurips_supplementary_material/fast-bayesian-coresets/examples/sparse_regression/._run_experiment.sh
- neurips_supplementary_material/fast-bayesian-coresets/examples/sparse_regression/make_plots.sh
- __MACOSX/neurips_supplementary_material/fast-bayesian-coresets/examples/sparse_regression/._make_plots.sh
- neurips_supplementary_material/fast-bayesian-coresets/examples/sparse_regression/main.py
- __MACOSX/neurips_supplementary_material/fast-bayesian-coresets/examples/sparse_regression/._main.py
