# Supplementary material
Source: ML conference proceedings conference paper supplement (https://proceedings.neurips.cc/paper_files/paper/2022/hash/005413e90d003d13886019607b037f52-Abstract.html)
Supplement: Supplementary file 1 [file 005413e90d003d13886019607b037f52-Supplemental-Conference.zip › neurips_supplementary_material/fast-bayesian-coresets/bayesiancoresets/coreset/sampling.py]

import numpy as np
from ..util.errors import NumericalPrecisionError
from .coreset import Coreset

class UniformSamplingCoreset(Coreset):
  def __init__(self, data, **kw):
    super().__init__(**kw)
    self.data = data
    self.cts = []
    self.ct_idcs = [] 

  def reset(self):
    self.cts = []
    self.ct_idcs = []
    super().reset()

  def _build(self, size):
    for i in range(size):
      f = np.random.randint(self.data.shape[0])
      if f in self.ct_idcs:
        self.cts[self.ct_idcs.index(f)] += 1
      else:
        self.ct_idcs.append(f)
        self.cts.append(1)
    self.wts = self.data.shape[0]*np.array(self.cts)/np.array(self.cts).sum()
    self.idcs = np.array(self.ct_idcs)
    self.pts = self.data[self.idcs]
