# Supplementary material
Source: ML conference proceedings conference paper supplement (https://proceedings.neurips.cc/paper_files/paper/2022/hash/005413e90d003d13886019607b037f52-Abstract.html)
Supplement: Supplementary file 1 [file 005413e90d003d13886019607b037f52-Supplemental-Conference.zip › neurips_supplementary_material/fast-bayesian-coresets/bayesiancoresets/coreset/sparsevi.py]

import numpy as np
from ..util.errors import NumericalPrecisionError
from ..util.opt import nn_opt
from .coreset import Coreset

class SparseVICoreset(Coreset):
  def __init__(self, data, projector, n_subsample_select=None, n_subsample_opt=None, opt_itrs=100, step_sched=lambda i : 1./(1.+i), **kw): 
    self.data = data
    self.projector = projector
    self.n_subsample_select = None if n_subsample_select is None else min(data.shape[0], n_subsample_select)
    self.n_subsample_opt = None if n_subsample_opt is None else min(data.shape[0], n_subsample_opt)
    self.step_sched = step_sched
    self.opt_itrs = opt_itrs
    super().__init__(**kw)

  def _build(self, size):
    for i in range(size):
      #search for the next best point
      self._select()
      #update the weights
      self._optimize() 

  def _get_projection(self, n_subsample, w, p):
    #update the projector
    self.projector.update(w, p)

    #construct a tangent space
    if n_subsample is None:
      sub_idcs = None
      vecs = self.projector.project(self.data)
      sum_scaling = 1.
    else:
      sub_idcs = np.random.randint(self.data.shape[0], size=n_subsample)
      vecs = self.projector.project(self.data[sub_idcs])
      sum_scaling = self.data.shape[0]/n_subsample

    if self.pts.size > 0:
      corevecs = self.projector.project(self.pts)
    else:
      corevecs = np.zeros((0, vecs.shape[1]))

    return vecs, sum_scaling, sub_idcs, corevecs

  def _select(self):
    vecs, sum_scaling, sub_idcs, corevecs = self._get_projection(self.n_subsample_select, self.wts, self.pts)

    #compute the residual error
    resid = sum_scaling*vecs.sum(axis=0) - self.wts.dot(corevecs)

    #compute the correlations for the new subsample
    corrs = vecs.dot(resid) / np.sqrt((vecs**2).sum(axis=1)) / vecs.shape[1] #up to a constant; good enough for argmax
    #compute the correlations for the coreset pts (use fabs because we can decrease the weight of these)
    corecorrs = np.fabs(corevecs.dot(resid) / np.sqrt((corevecs**2).sum(axis=1))) / corevecs.shape[1] #up to a constant; good enough for argmax

    #get the best selection; if it's an old coreset pt do nothing, if it's a new point expand and initialize storage for the new pt
    if corecorrs.size == 0 or corrs.max() > corecorrs.max():
      f = sub_idcs[np.argmax(corrs)] if sub_idcs is not None else np.argmax(corrs)
      #expand and initialize storage for new coreset pt
      #need to double-check that f isn't in self.idcs, since the subsample may contain some of the coreset pts
      if f not in self.idcs:
        self.wts.resize(self.wts.shape[0]+1)
        self.idcs.resize(self.idcs.shape[0]+1)
        self.pts.resize((self.pts.shape[0]+1, self.data.shape[1]))
        self.wts[-1] = 0.
        self.idcs[-1] = f
        self.pts[-1] = self.data[f] 
    return

  def _optimize(self):
    def grd(w):
      vecs, sum_scaling, sub_idcs, corevecs = self._get_projection(self.n_subsample_opt, w, self.pts)
      resid = sum_scaling*vecs.sum(axis=0) - w.dot(corevecs)
      #output gradient of weights at idcs
      return -corevecs.dot(resid) / corevecs.shape[1]
    x0 = self.wts
    self.wts = nn_opt(x0, grd, opt_itrs = self.opt_itrs, step_sched = self.step_sched)

  def error(self):
    return 0. #TODO: implement KL estimate
