# Supplementary material
Source: ML conference proceedings conference paper supplement (https://proceedings.neurips.cc/paper_files/paper/2022/hash/005413e90d003d13886019607b037f52-Abstract.html)
Supplement: Supplementary file 1 [file 005413e90d003d13886019607b037f52-Supplemental-Conference.zip › neurips_supplementary_material/fast-bayesian-coresets/bayesiancoresets/snnls/__init__.py]

from .frankwolfe import FrankWolfe
from .sampling import ImportanceSampling, UniformSampling
from .giga import GIGA
from .orthopursuit import OrthoPursuit
from .iht import IHT
