# Supplementary material
Source: ML conference proceedings conference paper supplement (https://proceedings.neurips.cc/paper_files/paper/2022/hash/005413e90d003d13886019607b037f52-Abstract.html)
Supplement: Supplementary file 1 [file 005413e90d003d13886019607b037f52-Supplemental-Conference.zip › neurips_supplementary_material/fast-bayesian-coresets/bayesiancoresets/snnls/sampling.py]

import numpy as np
from ..util.errors import NumericalPrecisionError
from .snnls import SparseNNLS


class ImportanceSampling(SparseNNLS):

  def __init__(self, A, b):
    super().__init__(A, b)
    self.cts = np.zeros(self.w.shape[0]) 
    self.ps = np.sqrt((self.A**2).sum(axis=0))
    if np.any(self.ps > 0):
      self.ps /= self.ps.sum()
    else:
      self.ps = np.ones(self.w.shape[0]) / float(self.w.shape[0])
    self.check_error_monotone = False

  def reset(self):
    super().reset()
    self.cts = np.zeros(self.w.shape[0]) 

  def _compute_sampling_probabilities(self):
    self.ps = np.sqrt((self.A**2).sum(axis=0))
    if np.any(self.ps > 0):
      self.ps / self.ps.sum()

  def _select(self):
    return np.random.choice(self.ps.shape[0], p = self.ps)

  def _reweight(self, f):
    self.cts[f] += 1
    self.w = (self.cts / self.cts.sum()) / self.ps 

class UniformSampling(ImportanceSampling):
  def __init__(self, A, b):
    super().__init__(A, b)
    self.ps = np.ones(self.w.shape[0]) / float(self.w.shape[0])
