# Supplementary material
Source: ML conference proceedings conference paper supplement (https://proceedings.neurips.cc/paper_files/paper/2022/hash/005413e90d003d13886019607b037f52-Abstract.html)
Supplement: Supplementary file 1 [file 005413e90d003d13886019607b037f52-Supplemental-Conference.zip › neurips_supplementary_material/fast-bayesian-coresets/bayesiancoresets/util/__init__.py]

from .opt import nn_opt, an_opt
from .log import set_verbosity #, set_repeat

TOL = 1e-12
def set_tolerance(tol):
  global TOL
  TOL = tol
