# Supplementary material
Source: ML conference proceedings conference paper supplement (https://proceedings.neurips.cc/paper_files/paper/2022/hash/005413e90d003d13886019607b037f52-Abstract.html)
Supplement: Supplementary file 1 [file 005413e90d003d13886019607b037f52-Supplemental-Conference.zip › neurips_supplementary_material/fast-bayesian-coresets/examples/common/laplace.py]

import numpy as np
from scipy.optimize import minimize
from scipy.linalg import solve_triangular
import time

__nf = 1
def _callback(x, obj):
    global __nf
    print(f"Laplace iteration {__nf}, objective {obj(x)}")
    __nf += 1

class LaplaceApprox(object):
    def __init__(self, log_joint, grad_log_joint, th0, bounds=None, hess_log_joint=None, diag_hess_log_joint=None,
                 trials=10):
        self.log_joint = log_joint
        self.grad_log_joint = grad_log_joint
        self.trials = trials
        self.th0 = th0
        self.bounds = bounds
        if (hess_log_joint is None and diag_hess_log_joint is None) or ((hess_log_joint is not None) and (diag_hess_log_joint is not None)):
            raise ValueError("ERROR: Exactly one of hess_log_joint or diag_hess_log_joint must be specified")
        if hess_log_joint is not None:
            self.hess_log_joint = hess_log_joint
            self.diag = False
        else:
            self.hess_log_joint = diag_hess_log_joint
            self.diag = True

    def build(self, size):
        _th0 = self.th0.copy()
        for i in range(self.trials):
            try:
                res = minimize(lambda mu: -self.log_joint(mu), _th0,
                        jac=lambda mu: -self.grad_log_joint(mu), callback=lambda x : _callback(x, self.log_joint),
                               bounds = self.bounds)
                self.th = res.x
            except Exception as e:
                print(e)
                _th0 += (np.sqrt((_th0 ** 2).sum()) + 0.1) * 0.1 * np.random.randn(_th0.shape[0])
                # clip _th0 to satisfy bounds
                if self.bounds is not None:
                    lbs = [b[0] for b in self.bounds]
                    ubs = [b[1] for b in self.bounds]
                    _th0 = np.clip(_th0,lbs,ubs)

                print("current theta0: {}".format(_th0))
                continue
            break
        if self.diag:
            self.LSigInv = np.sqrt(-self.hess_log_joint(self.th))
            self.LSig = 1. / self.LSigInv
        else:
            self.LSigInv = np.linalg.cholesky(-self.hess_log_joint(self.th))
            self.LSig = solve_triangular(self.LSigInv, np.eye(self.LSigInv.shape[0]), lower=True, overwrite_b=True, check_finite=False)

    def sample(self, n, get_timing = False):
        t0 = time.perf_counter()
        if self.diag:
            samps = self.th + self.LSig*np.random.randn(n, self.th.shape[0])
        else:
            samps = self.th + (self.LSig.dot(np.random.randn(self.th.shape[0],n))).T
        t_tot = time.perf_counter() - t0
        t_per = t_tot/n
        if get_timing:
            return samps, t_tot, t_per
        else:
            return samps
