# Supplementary material
Source: ML conference proceedings conference paper supplement (https://proceedings.neurips.cc/paper_files/paper/2022/hash/005413e90d003d13886019607b037f52-Abstract.html)
Supplement: Supplementary file 1 [file 005413e90d003d13886019607b037f52-Supplemental-Conference.zip › neurips_supplementary_material/fast-bayesian-coresets/examples/common/model_gaussian.py]

import numpy as np
import scipy.linalg as sl

def log_likelihood(x, th, sig):
  x = np.atleast_2d(x)
  th = np.atleast_2d(th)
  xx = (x**2).sum(axis=1)/sig**2
  thth = (th**2).sum(axis=1)/sig**2
  xth = x.dot(th.T)
  return -x.shape[1]/2.*np.log(2*np.pi*sig**2) - 1./2.*(xx[:, np.newaxis] + thth - 2*xth)

def log_prior(th, mu0, sig0):
  th = np.atleast_2d(th)
  return -th.shape[1]/2.*np.log(2*np.pi*sig0**2) - 1./2.*((th - mu0)**2).sum(axis=1)/sig0**2

def log_joint(x, th, wts, sig, mu0, sig0):
  return (wts[:, np.newaxis]*log_likelihood(x, th, sig)).sum(axis=0) + log_prior(th, mu0, sig0)

def grad_log_likelihood(x, th, sig):
  x = np.atleast_2d(x)
  th = np.atleast_2d(th)
  return -(th[np.newaxis, : :] - x[:, np.newaxis, :])/sig**2

def grad_log_prior(th, mu0, sig0):
  th = np.atleast_2d(th)
  return -(th - mu0)/sig0**2
#def grad_log_joint(x, th, wts, sig, mu0, sig0):
#  return (wts[:, np.newaxis, np.newaxis]*grad_log_likelihood(x, th, sig)).sum(axis=0) + grad_log_prior(th, mu0, sig0)

def grad_log_joint(x, th, wts, sig, mu0, sig0):
  # do this computation in x-blocks to avoid high memory usage in the large N regime
  blk = 500
  grd = grad_log_prior(th, mu0, sig0)
  for i in range(0, x.shape[0], blk):
    grd += (wts[i:(i+blk), np.newaxis, np.newaxis]*grad_log_likelihood(x[i:(i+blk), :], th, sig)).sum(axis=0)
  return grd

def hess_log_likelihood(x, th, sig):
  th = np.atleast_2d(th)
  return -np.ones((x.shape[0], th.shape[0], th.shape[1]))/sig**2

def hess_log_prior(th, mu0, sig0):
  th = np.atleast_2d(th)
  return -np.ones((th.shape[0], th.shape[1]))/sig0**2

#def hess_log_joint(x, th, wts, sig, mu0, sig0):
#  return (wts[:, np.newaxis, np.newaxis]*hess_log_likelihood(x, th, sig)).sum(axis=0) + hess_log_prior(th, mu0, sig0)

def hess_log_joint(x, th, wts, sig, mu0, sig0):
  # do this computation in x-blocks to avoid high memory usage in the large N regime
  blk = 500
  hess = hess_log_prior(th, mu0, sig0)
  for i in range(0, x.shape[0], blk):
    hess += (wts[i:(i+blk), np.newaxis, np.newaxis]*hess_log_likelihood(x[i:(i+blk),:], th, sig)).sum(axis=0)
  return hess

def weighted_post(mu0, sig0, sig, x, w):
  sigp = np.sqrt(1./(1./sig0**2 + w.sum()/sig**2))
  if w.shape[0] > 0:
    mup = sigp**2*(mu0/sig0**2 + (w[:,np.newaxis]*x).sum(axis=0)/sig**2)
  else:
    mup = mu0*np.ones(x.shape[1])
  return mup, sigp

def KL(mu0, Sig0, mu1, Sig1inv):
  t1 = np.dot(Sig1inv, Sig0).trace()
  t2 = np.dot((mu1-mu0),np.dot(Sig1inv, mu1-mu0))
  t3 = -np.linalg.slogdet(Sig1inv)[1] - np.linalg.slogdet(Sig0)[1]
  return 0.5*(t1+t2+t3-mu0.shape[0])

def MH_proposal(th):
  th = np.atleast_2d(th)
  th_new = th + 0.1*np.random.randn(1,th.shape[1])
  return th_new

def log_MH_transition_ratio(th,th_new):
  # Symmetric proposal so log transition ratio is 0
  return 0
