# Supplementary material
Source: ML conference proceedings conference paper supplement (https://proceedings.neurips.cc/paper_files/paper/2022/hash/005413e90d003d13886019607b037f52-Abstract.html)
Supplement: Supplementary file 1 [file 005413e90d003d13886019607b037f52-Supplemental-Conference.zip › neurips_supplementary_material/fast-bayesian-coresets/examples/common/model_linreg.py]

import numpy as np
import scipy.linalg as sl

def gen_synthetic(n, d, sig):
  th = np.random.randn(d)
  X = np.random.randn(n, d)
  y = X.dot(th) + sig*np.random.randn(n)
  return X, y

def log_likelihood(z, th, sig):
    z = np.atleast_2d(z)
    th = np.atleast_2d(th)
    x = z[:, :-1]
    y = z[:, -1]
    XST = x.dot(th.T)
    return -1./2.*np.log(2.*np.pi*sig**2) - 1./(2.*sig**2)*(y[:,np.newaxis]**2 - 2*XST*y[:,np.newaxis] + XST**2)

def grad_log_likelihood(z, th, sig):
    z = np.atleast_2d(z)
    th = np.atleast_2d(th)
    x = z[:, :-1]
    y = z[:, -1]
    return 1./sig**2*(y[:, np.newaxis] - x.dot(th.T))[:,:,np.newaxis]* x[:, np.newaxis, :]

def log_prior(th, mu0, sig0):
    th = np.atleast_2d(th)
    return -th.shape[1]/2.*np.log(2.*np.pi*sig0**2) - 1./2.*((th - mu0)**2).sum(axis=1)/sig0**2

def grad_log_prior(th, mu0, sig0):
    th = np.atleast_2d(th)
    return -(th - mu0)/sig0**2

def log_joint(z, th, w, sig, mu0, sig0):
    return (w[:,np.newaxis]*log_likelihood(z, th, sig)).sum(axis=0) + log_prior(th, mu0, sig0)

def grad_log_joint(z, th, w, sig, mu0, sig0):
    return (w[:,np.newaxis,np.newaxis]*grad_log_likelihood(z, th, sig)).sum(axis=0) + grad_log_prior(th, mu0, sig0)

def hess_log_joint(z, th, w, sig, mu0, sig0):
    z = np.atleast_2d(z)
    th = np.atleast_2d(th)
    x = z[:, :-1]
    y = z[:, -1]
    return -(w*x.T).dot(x)/sig**2 - np.eye(x.shape[1])/sig0**2

def weighted_post_sampler(n, z, w, sig, mu0, sig0):
    x = z[:, :-1]
    y = z[:, -1]
    if w.shape[0] > 0:
        SigpInv = np.eye(x.shape[1])/sig0**2 + (w*x.T).dot(x)/sig**2
        LSigpInv = np.linalg.cholesky(SigpInv)
        USigp = sl.solve_triangular(LSigpInv, np.eye(LSigpInv.shape[0]), lower=True, overwrite_b=True, check_finite=False).T # Sigp = UU^T, U upper tri
        mup = (USigp.dot(USigp.T)).dot(mu0*np.ones(x.shape[1])/sig0**2 + (w[:,np.newaxis]*y[:,np.newaxis]*x).sum(axis=0)/sig**2)
    else:
        mup = mu0*np.ones(x.shape[1])
        USigp = sig0*np.eye(x.shape[1])
    return mup + USigp.dot(np.random.randn(x.shape[1], n)).T

def MH_proposal(th):
  th = np.atleast_2d(th)
  th_new = th + 0.1*np.random.randn(1,th.shape[1])
  return th_new

def log_MH_transition_ratio(th,th_new):
  # Symmetric proposal so log transition ratio is 0
  return 0

stan_code = """
data {
  int<lower=0> n; // number of observations
  int<lower=0> d; // number of predictors
  vector[n] y; // outputs
  matrix[n,d] x; // inputs
  vector<lower=0>[n] w;  // weights
  real mu0;
  real<lower=0> sig0;
  real<lower=0> sig;
}
parameters {
  vector[d] theta; // auxiliary parameter
}
model {
  for(i in 1:d){
      theta[i] ~ normal(mu0, sig0);
  }
  for(i in 1:n){
    target += normal_lpdf(y[i] | x[i]*theta, sig) * w[i];
  }
}
"""
