# Supplementary material
Source: ML conference proceedings conference paper supplement (https://proceedings.neurips.cc/paper_files/paper/2022/hash/005413e90d003d13886019607b037f52-Abstract.html)
Supplement: Supplementary file 1 [file 005413e90d003d13886019607b037f52-Supplemental-Conference.zip › neurips_supplementary_material/fast-bayesian-coresets/examples/data/download.py]

import os
import requests
from tqdm import tqdm

def download_file(url, filename):
    if os.path.exists(filename):
        print("File already exists, continuing")
        return
    # Streaming, so we can iterate over the response.
    response = requests.get(url, stream=True)
    total_size_in_bytes= int(response.headers.get('content-length', 0))
    block_size = 1024 #1 Kibibyte
    progress_bar = tqdm(total=total_size_in_bytes, unit='iB', unit_scale=True)
    with open(filename, 'wb') as file:
        for data in response.iter_content(block_size):
            progress_bar.update(len(data))
            file.write(data)
    progress_bar.close()
    if total_size_in_bytes != 0 and progress_bar.n != total_size_in_bytes:
        print("ERROR, something went wrong")
    return
