# Supplementary material
Source: ML conference proceedings conference paper supplement (https://proceedings.neurips.cc/paper_files/paper/2022/hash/005413e90d003d13886019607b037f52-Abstract.html)
Supplement: Supplementary file 1 [file 005413e90d003d13886019607b037f52-Supplemental-Conference.zip › neurips_supplementary_material/fast-bayesian-coresets/examples/data/get_synthetic_gaussian_data.py]

import numpy as np

np.random.seed(1)
N = 1000000
D = 100
mu = 10*np.random.randn(D)
sig = 10.
np.save("synth_gauss_large.npy", mu + sig*np.random.randn(N, D))
