# Supplementary material
Source: ML conference proceedings conference paper supplement (https://proceedings.neurips.cc/paper_files/paper/2022/hash/005413e90d003d13886019607b037f52-Abstract.html)
Supplement: Supplementary file 1 [file 005413e90d003d13886019607b037f52-Supplemental-Conference.zip › neurips_supplementary_material/fast-bayesian-coresets/examples/data/run.sh]

#!/bin/bash

for bound in {500000..1017357..50000}
do
	python3 process_housing_prices.py $bound $((bound+50000)) > logfile-$bound-$((bound+50000)).log 2>&1 &
done
