# Supplementary material
Source: ML conference proceedings conference paper supplement (https://proceedings.neurips.cc/paper_files/paper/2022/hash/005413e90d003d13886019607b037f52-Abstract.html)
Supplement: Supplementary file 1 [file 005413e90d003d13886019607b037f52-Supplemental-Conference.zip › neurips_supplementary_material/fast-bayesian-coresets/examples/gaussian/run_experiment.sh]

#!/bin/bash

# Run all algorithms
for alg in "LAP" "GIGA" "IHT" "UNIF" "QNC" "FULL"
#for alg in "IHT-LAP" "GIGA-LAP"
do
    for ID in {1..10}
    do
    	for M in 100 500 1000 5000 10000
        do
       		python3 main.py --samples_inference 1000 --alg $alg --trial $ID --coreset_size $M --proj_dim 500 run
       	done
    done
done
