# Supplementary material
Source: ML conference proceedings conference paper supplement (https://proceedings.neurips.cc/paper_files/paper/2022/hash/005413e90d003d13886019607b037f52-Abstract.html)
Supplement: Supplementary file 1 [file 005413e90d003d13886019607b037f52-Supplemental-Conference.zip › neurips_supplementary_material/fast-bayesian-coresets/examples/linear_regression/plot_coreset_pts.py]

import bokeh.layouts as bkl
import pickle as pk
import bokeh.plotting as bkp
import numpy as np
import sys,os
#make it so we can import models/etc from parent folder
sys.path.insert(1, os.path.join(sys.path[0], '../common'))
from plotting import *
from skimage import measure


print('Loading data')
x = np.load('../data/prices2018.npy')

latbds = (x[:, 0].min(), x[:, 0].max())
lonbds = (x[:, 1].min(), x[:, 1].max())

lats = np.linspace(latbds[0], latbds[1], 100)
lons = np.linspace(lonbds[0], lonbds[1], 100)

longrid, latgrid = np.meshgrid(lons, lats)

contour_percentiles = np.linspace(0, 100, 10)
c = contour_percentiles / contour_percentiles.max()
contour_colors = ['#%02x%02x%02x' % (int(r), int(b), int(g)) for (r, b, g) in zip(255*c, 0*np.ones(c.shape[0]), 255*(1.-c))]

#algorithm / trial + Ms to plot
nm = ('SVI', 'SparseVI')
#nm = ('GIGAT', 'GIGA-T')
trial_num = 5

#plot the sequence of coreset pts and comparison of nonopt + opt
f = open('results/results_'+nm[0]+'_' + str(trial_num)+'.pk', 'rb')
res = pk.load(f) #res = (x, mu0, Sig0, mup, Sigp, w, p, muw, Sigw, rklw, fklw, basis_scales, basis_locs, datastd)
f.close()
x = res[0]
wt = res[5]
pt = res[6]
mup = res[3]
Sigp = res[4]
muwt = res[7]
Sigwt = res[8]
basis_scales = res[11]
basis_locs = res[12]
datastd = res[13]

#Ms = np.linspace(1, len(wt), 7, dtype=np.int64)
Ms = [1, 2, 5, 10]

figs = []

#true posterior figure
fig = bkp.figure(x_range=lonbds, y_range=latbds, plot_width=750, plot_height=750)
#for f in [fig, fig_opt]:
for f in [fig]:
  preprocess_plot(f, '24pt', False, False)

#plot data and coreset pts
f.scatter(x[:, 1], x[:, 0], fill_color='black', size=10, alpha=0.01, line_color=None)
#compute posterior mean regression on the grid
reg = np.zeros(longrid.shape)
for i in range(basis_scales.shape[0]):
  reg += mup[i]*np.exp(-(longrid - basis_locs[i,1])**2/(2*basis_scales[i]**2) - (latgrid - basis_locs[i,0])**2/(2*basis_scales[i]**2) )
#contour_levels
contour_levels = [np.percentile(reg, p) for p in contour_percentiles]
#plot contours
for color, level in zip(contour_colors, contour_levels):
  contours = measure.find_contours(reg, level)
  for contour in contours:
    #interpolate values
    latlons = np.hstack(( np.interp(contour[:, 0], np.arange(lats.shape[0]), lats)[:, np.newaxis], np.interp(contour[:, 1], np.arange(lons.shape[0]), lons)[:, np.newaxis]))
    f.line(latlons[:, 1], latlons[:, 0], line_width=2, line_color=color)
   
for f in [fig]:
  postprocess_plot(f, '24pt', orientation='horizontal', glyph_width=80)
  f.legend.background_fill_alpha=0.
  f.legend.border_line_alpha=0.
  #f.legend.visible=False
  f.xaxis.visible = False
  f.yaxis.visible = False

figs.append([fig])


#coreset figures
for m in Ms:
  fig = bkp.figure(x_range=lonbds, y_range=latbds, plot_width=750, plot_height=750)
  preprocess_plot(fig, '24pt', False, False)

  #plot data and coreset pts
  fig.scatter(x[:, 1], x[:, 0], fill_color='black', size=10, alpha=0.01, line_color=None)

  #compute rough position of pseudopoints based on feature vectors
  ps = (np.fabs(pt[m][:,:-1])/np.fabs(pt[m][:,:-1]).sum(axis=1)[:,np.newaxis]).dot(basis_locs)
  #fig.scatter(x[:, 1], x[:, 0], fill_color='black', size=10*(wt[m, :]>0)+10*wt[m,:]/wt[m,:].max(), line_color=None)
  fig.scatter(ps[:, 1], ps[:, 0], fill_color='black', size=30*np.power(wt[m]/wt[m].max(), 0.4), line_color=None)
  #compute posterior mean regression on the grid
  reg = np.zeros(longrid.shape)
  for i in range(basis_scales.shape[0]):
    reg += muwt[m, i]*np.exp(-(longrid - basis_locs[i,1])**2/(2*basis_scales[i]**2) - (latgrid - basis_locs[i,0])**2/(2*basis_scales[i]**2) )
  #plot contours
  for color, level in zip(contour_colors, contour_levels):
    contours = measure.find_contours(reg, level)
    for contour in contours:
      #interpolate values
      latlons = np.hstack(( np.interp(contour[:, 0], np.arange(lats.shape[0]), lats)[:, np.newaxis], np.interp(contour[:, 1], np.arange(lons.shape[0]), lons)[:, np.newaxis]))
      fig.line(latlons[:, 1], latlons[:, 0], line_width=2, line_color=color)
     
  postprocess_plot(fig, '24pt', orientation='horizontal', glyph_width=80)
  fig.legend.background_fill_alpha=0.
  fig.legend.border_line_alpha=0.
  fig.xaxis.visible = False
  fig.yaxis.visible = False

  figs.append([fig])

bkp.show(bkl.gridplot(figs))
