# Supplementary material
Source: ML conference proceedings conference paper supplement (https://proceedings.neurips.cc/paper_files/paper/2022/hash/005413e90d003d13886019607b037f52-Abstract.html)
Supplement: Supplementary file 1 [file 005413e90d003d13886019607b037f52-Supplemental-Conference.zip › neurips_supplementary_material/fast-bayesian-coresets/examples/linear_regression/run_experiment.sh]

#!/bin/bash

for alg in "LAP" "FULL" "UNIF" "IHT" "QNC" "GIGA"
#for alg in "IHT-LAP" "GIGA-LAP"
do
    for ID in {1..10}
    do
    	for M in 50 100 500 1000 5000 10000
    	do
			python3 main.py --data_num 100000 --n_bases_per_scale 50 --coreset_size $M --alg $alg --trial $ID --proj_dim 500 run
		done
	done
done
