# Supplementary material
Source: ML conference proceedings conference paper supplement (https://proceedings.neurips.cc/paper_files/paper/2022/hash/005413e90d003d13886019607b037f52-Abstract.html)
Supplement: Supplementary file 1 [file 005413e90d003d13886019607b037f52-Supplemental-Conference.zip › neurips_supplementary_material/fast-bayesian-coresets/examples/logistic_heavy_tailed/make_plots.sh]

#!/bin/bash

for dnm in "delays_medium"
do
#    python3 main.py --model lr --dataset $dnm plot coreset_size mu_err --plot_toolbar --groupby coreset_size --plot_type line --plot_legend alg --plot_x_label "Coreset Size" --plot_y_label "Mean Error"
#    python3 main.py --model lr --dataset $dnm plot coreset_size Sig_err --plot_toolbar --groupby coreset_size --plot_type line --plot_legend alg --plot_x_label "Coreset Size" --plot_y_label "Cov Error"
    python3 main.py --model lr --dataset $dnm plot coreset_size mu_err_full --plot_toolbar --groupby coreset_size --plot_type line --plot_legend alg --plot_x_label "Coreset Size" --plot_y_label "Relative Mean Error"
    python3 main.py --model lr --dataset $dnm plot coreset_size Sig_err_full --plot_toolbar --groupby coreset_size --plot_type line --plot_legend alg --plot_x_label "Coreset Size" --plot_y_label "Relative Log-Variance Error"
    python3 main.py --model lr --dataset $dnm plot coreset_size imq_stein --plot_toolbar --groupby coreset_size --plot_type line --plot_legend alg --plot_x_label "Coreset Size" --plot_y_label "IMQ Stein Discr."
    python3 main.py --model lr --dataset $dnm plot coreset_size gauss_stein --plot_toolbar --groupby coreset_size --plot_type line --plot_legend alg --plot_x_label "Coreset Size" --plot_y_label "Gauss Stein Discr."
    python3 main.py --model lr --dataset $dnm plot coreset_size imq_mmd --plot_toolbar --groupby coreset_size --plot_type line --plot_legend alg --plot_x_label "Coreset Size" --plot_y_label "IMQ MMD Discr."
    python3 main.py --model lr --dataset $dnm plot coreset_size gauss_mmd --plot_toolbar --groupby coreset_size --plot_type line --plot_legend alg --plot_x_label "Coreset Size" --plot_y_label "Gauss MMD Discr."
    python3 main.py --model lr --dataset $dnm plot coreset_size fklw --plot_toolbar --groupby coreset_size --plot_type line --plot_legend alg --plot_x_label "Coreset Size" --plot_y_label "Forward KL"
    python3 main.py --model lr --dataset $dnm plot coreset_size rklw_full --plot_toolbar --groupby coreset_size --plot_type line --plot_legend alg --plot_x_label "Coreset Size" --plot_y_label "Reverse KL"
	python3 main.py --model lr --dataset $dnm plot coreset_size t_build --plot_toolbar --groupby coreset_size --plot_type line --plot_legend alg --plot_x_label "Coreset Size" --plot_y_label "Build Time (s)"
	python3 main.py --model lr --dataset $dnm plot coreset_size t_per_sample --plot_toolbar --groupby coreset_size --plot_type line --plot_legend alg --plot_x_label "Coreset Size" --plot_y_label "Per Sample Time (s)"
done
