# Supplementary material
Source: ML conference proceedings conference paper supplement (https://proceedings.neurips.cc/paper_files/paper/2022/hash/005413e90d003d13886019607b037f52-Abstract.html)
Supplement: Supplementary file 1 [file 005413e90d003d13886019607b037f52-Supplemental-Conference.zip › neurips_supplementary_material/fast-bayesian-coresets/examples/sparse_regression/run_experiment.sh]

#!/bin/bash

for dnm in "delays_medium"
do
    for alg in "LAP" "UNIF" "IHT" "QNC" "GIGA" "FULL"
#    for alg in "IHT-LAP" "GIGA-LAP"
    do
        for ID in {1..10}
        do
        	for M in 50 100 500 1000 5000
        	do
				python3 main.py --dataset $dnm --coreset_size $M --alg $alg --trial $ID run
			done
		done
    done
done
