# Supplementary material
Source: ML conference proceedings conference paper supplement (https://proceedings.neurips.cc/paper_files/paper/2022/hash/005413e90d003d13886019607b037f52-Abstract.html)
Supplement: Supplementary file 1 [file 005413e90d003d13886019607b037f52-Supplemental-Conference.zip › neurips_supplementary_material/fast-bayesian-coresets/README.md]

### Installation and Dependencies

To install with pip, download the repository and run `pip3 install . --user` in the repository's root folder.

The experiments depend on [NumPy](http://www.numpy.org), [SciPy](https://www.scipy.org), [SciKit Learn](https://scikit-learn.org),
[PyStan](https://pystan.readthedocs.io/en/latest/), [pandas](https://pandas.pydata.org/) and [Bokeh](https://bokeh.pydata.org/en/latest). 

### Instructions 

In order to run the synthetic Gaussian experiment, the data needs to be generated by running the `get_synthetic_gaussian_data.py`
file within the `data` folder. This is because the dataset is too large to fit within
the size limit.

Having done this, all experiments can be run by running
`run_experiment.sh` under each directory.
To plot the results, run `make_plots.sh` under each directory.
