# Supplementary material
Source: ML conference proceedings conference paper supplement (https://proceedings.neurips.cc/paper_files/paper/2022/hash/005413e90d003d13886019607b037f52-Abstract.html)
Supplement: Supplementary file 1 [file 005413e90d003d13886019607b037f52-Supplemental-Conference.zip › neurips_supplementary_material/fast-bayesian-coresets/setup.py]

from setuptools import setup, find_packages

setup(
    name = 'fast-bayesian-coresets',
    description="Fast Bayesian Coresets via Subsampling and Quasi-Newton Refinement",
    packages=find_packages(exclude=('examples','examples.*')),
    install_requires=['numpy', 'scipy', 'scikit-learn', 'pandas', 'bokeh', 'pystan'],
    platforms='ALL',
)
